# Supplementary material for: Influence of time from admission to norepinephrine administration and volume of fluids received on outcomes of patients meeting sepsis-3 criteria: a retrospective study using the MIMIC-IV database
Source: HighWire-hosted journal article supplement (doi:10.1136/tsaco-2022-001024), 2023-04-01
Supplement: tsaco-2022-001024supp001_data_supplement.pdf [file tsaco-2022-001024supp001_data_supplement.pdf]

## Supplemental Materials

Supplemental Table 1: Positive culture sources by Early and Late NE cohorts

|                           | Late NE<br>(N=1034) | Early NE<br>(N=1045) | Total<br>(N=2079) | p<br>value |
|---------------------------|---------------------|----------------------|-------------------|------------|
| Staph aureus Screen       | 7.0 (0.7%)          | 1.0 (0.1%)           | 8.0 (0.4%)        | 0.0321     |
| SWAB                      | 21.0 (2.0%)         | 21.0 (2.0%)          | 42.0 (2.0%)       | 0.9721     |
| URINE                     | 86.0 (8.3%)         | 60.0 (5.7%)          | 146.0 (7.0%)      | 0.0221     |
| BRONCHOALVEOLAR<br>LAVAGE | 40.0 (3.9%)         | 30.0 (2.9%)          | 70.0 (3.4%)       | 0.2071     |
| STOOL                     | 15.0 (1.5%)         | 13.0 (1.2%)          | 28.0 (1.3%)       | 0.6831     |
| TISSUE                    | 14.0 (1.4%)         | 5.0 (0.5%)           | 19.0 (0.9%)       | 0.0361     |
| PERITONEAL FLUID          | 4.0 (0.4%)          | 2.0 (0.2%)           | 6.0 (0.3%)        | 0.4061     |
| ABCESS                    | 4.0 (0.4%)          | 3.0 (0.3%)           | 7.0 (0.3%)        | 0.6951     |
| MRSA SCREEN               | 15.0 (1.5%)         | 8.0 (0.8%)           | 23.0 (1.1%)       | 0.1351     |
| CATHETER OR LINE          | 3.0 (0.3%)          | 1.0 (0.1%)           | 4.0 (0.2%)        | 0.3121     |
| SPUTUM                    | 88.0 (8.5%)         | 74.0 (7.1%)          | 162.0 (7.8%)      | 0.2241     |
| BRONCHIAL WASHINGS        | 8.0 (0.8%)          | 7.0 (0.7%)           | 15.0 (0.7%)       | 0.7801     |
| BLOOD                     | 98.0 (9.5%)         | 137.0 (13.1%)        | 235.0<br>(11.3%)  | 0.0091     |
| BILE                      | 4.0 (0.4%)          | 1.0 (0.1%)           | 5.0 (0.2%)        | 0.1751     |
| FOOT CULTURE              | 1.0 (0.1%)          | 0.0 (0.0%)           | 1.0 (0.0%)        | 0.3151     |
| PLEURAL FLUID             | 3.0 (0.3%)          | 1.0 (0.1%)           | 4.0 (0.2%)        | 0.3121     |
| FOREIGN BODY              | 1.0 (0.1%)          | 0.0 (0.0%)           | 1.0 (0.0%)        | 0.3151     |
| EAR                       | 1.0 (0.1%)          | 0.0 (0.0%)           | 1.0 (0.0%)        | 0.3151     |
| Isolate                   | 0.0 (0.0%)          | 1.0 (0.1%)           | 1.0 (0.0%)        | 0.3201     |
| TRACHEAL ASPIRATE         | 0.0 (0.0%)          | 1.0 (0.1%)           | 1.0 (0.0%)        | 0.3201     |

**Supplemental Table 2: Characteristics of Early and Late NE Groups in Patients Receiving Quartile 1 of Fluids (<0.815mL/kg\*hr)**

|                                     | Late NE (N=263)               | Early NE (N=258) | Total (N=521)        | p value              |
|-------------------------------------|-------------------------------|------------------|----------------------|----------------------|
| Age                                 | 65.8 (14.2)                   | 65.5 (14.1)      | 65.7 (14.1)          | 0.8481               |
| Ethnicity                           |                               |                  |                      | 0.8102               |
|                                     | AMERICAN INDIAN/ALASKA NATIVE | 1.0 (0.4%)       | 1.0 (0.4%)           | 2.0 (0.4%)           |
|                                     | ASIAN                         | 6.0 (2.3%)       | 5.0 (1.9%)           | 11.0 (2.1%)          |
|                                     | BLACK/AFRICAN AMERICAN        | 27.0 (10.3%)     | 38.0 (14.7%)         | 65.0 (12.5%)         |
|                                     | HISPANIC/LATINO               | 11.0 (4.2%)      | 7.0 (2.7%)           | 18.0 (3.5%)          |
|                                     | OTHER                         | 7.0 (2.7%)       | 8.0 (3.1%)           | 15.0 (2.9%)          |
|                                     | UNABLE TO OBTAIN              | 2.0 (0.8%)       | 1.0 (0.4%)           | 3.0 (0.6%)           |
|                                     | UNKNOWN                       | 31.0 (11.8%)     | 26.0 (10.1%)         | 57.0 (10.9%)         |
|                                     | WHITE                         | 178.0 (67.7%)    | 172.0 (66.7%)        | 350.0 (67.2%)        |
| Male Gender                         | 146.0 (55.5%)                 | 148.0 (57.4%)    | 294.0 (56.4%)        | 0.6702               |
| OASIS Score                         | 39.2 (9.2)                    | 38.7 (8.5)       | 39.0 (8.8)           | 0.4941               |
| APSIi Score                         | 65.6 (24.7)                   | 60.1 (23.3)      | 62.9 (24.1)          | 0.0091               |
| SAPSIi Score                        | 45.9 (14.3)                   | 44.0 (12.8)      | 45.0 (13.6)          | 0.1081               |
| SOFA Score                          | 10.3 (3.5)                    | 10.0 (3.1)       | 10.2 (3.3)           | 0.1941               |
| AIDS                                | 1.0 (0.4%)                    | 3.0 (1.2%)       | 4.0 (0.8%)           | 0.3062               |
| CVD                                 | 36.0 (13.7%)                  | 41.0 (15.9%)     | 77.0 (14.8%)         | 0.4792               |
| COPD                                | 78.0 (29.7%)                  | 80.0 (31.0%)     | 158.0 (30.3%)        | 0.7382               |
| CHF                                 | 132.0 (50.2%)                 | 94.0 (36.4%)     | 226.0 (43.4%)        | 0.0022               |
| Dementia                            | 7.0 (2.7%)                    | 11.0 (4.3%)      | 18.0 (3.5%)          | 0.3172               |
| Diabetes with Complication          | 46.0 (17.5%)                  | 44.0 (17.1%)     | 90.0 (17.3%)         | 0.8952               |
| Diabetes without Complication       | 82.0 (31.2%)                  | 76.0 (29.5%)     | 158.0 (30.3%)        | 0.6692               |
| Malignant Cancer                    | 40.0 (15.2%)                  | 38.0 (14.7%)     | 78.0 (15.0%)         | 0.8782               |
| Metastatic Solid Tumor              | 13.0 (4.9%)                   | 20.0 (7.8%)      | 33.0 (6.3%)          | 0.1882               |
| Mild Liver Disease                  | 65.0 (24.7%)                  | 56.0 (21.7%)     | 121.0 (23.2%)        | 0.4162               |
| MI                                  | 62.0 (23.6%)                  | 54.0 (20.9%)     | 116.0 (22.3%)        | 0.4682               |
| Paraplegia                          | 9.0 (3.4%)                    | 18.0 (7.0%)      | 27.0 (5.2%)          | 0.0672               |
| Peptic Ulcer Disease                | 17.0 (6.5%)                   | 13.0 (5.0%)      | 30.0 (5.8%)          | 0.4852               |
| PVD                                 | 39.0 (14.8%)                  | 26.0 (10.1%)     | 65.0 (12.5%)         | 0.1012               |
| Renal Disease                       | 93.0 (35.4%)                  | 68.0 (26.4%)     | 161.0 (30.9%)        | 0.0262               |
| Rheumatic Disease                   | 9.0 (3.4%)                    | 4.0 (1.6%)       | 13.0 (2.5%)          | 0.1712               |
| Severe Liver Disease                | 49.0 (18.6%)                  | 36.0 (14.0%)     | 85.0 (16.3%)         | 0.1492               |
| Weight                              | 88.7 (29.1)                   | 84.7 (25.2)      | 86.7 (27.3)          | 0.0901               |
| Central Line                        | 197.0 (74.9%)                 | 141.0 (54.7%)    | 338.0 (64.9%)        | < 0.001 <sup>1</sup> |
| First Hospital Admission            | 188.0 (71.5%)                 | 180.0 (69.8%)    | 368.0 (70.6%)        | 0.6672               |
| First ICU Admission                 | 242.0 (92.0%)                 | 247.0 (95.7%)    | 489.0 (93.9%)        | 0.0772               |
| Mechanically Ventilated Prior to NE | 159.0 (60.5%)                 | 165.0 (64.0%)    | 324.0 (62.2%)        | 0.4102               |
| Hospital LOS                        | 18.5 (19.7)                   | 13.6 (13.4)      | 16.1 (17.0)          | < 0.001 <sup>1</sup> |
| ICU LOS                             | 7.5 (8.3)                     | 6.1 (6.1)        | 6.8 (7.3)            | 0.0341               |
| Mortality                           | 69.0 (26.2%)                  | 45.0 (17.4%)     | 114.0 (21.9%)        | 0.0152               |
| Total Fluids prior to NE            | 435.8 (381.2)                 | 62.8 (82.8)      | 251.1 (333.9)        | < 0.001 <sup>1</sup> |
| Fluids per Kg per Hour              | 0.4 (0.2)                     | 0.3 (0.2)        | 0.3 (0.2)            | < 0.001 <sup>1</sup> |
| Fluids per Kg                       | 5.0 (4.1)                     | 0.7 (0.9)        | 2.9 (3.7)            | < 0.001 <sup>1</sup> |
|                                     | <b>0 (N=104)</b>              | <b>1 (N=93)</b>  | <b>Total (N=197)</b> | <b>p value</b>       |
| Mechanical Ventilation After NE     | 29.0 (27.9%)                  | 44.0 (47.3%)     | 73.0 (37.1%)         | 0.0052               |

**Supplemental Table 3: Outcomes in Early and Late NE Groups within Quartile 1**

| Predictor              | Estimate | SE    | Z      | p     | Odds Ratio or Standardized Estimate | Lower  | Upper  |
|------------------------|----------|-------|--------|-------|-------------------------------------|--------|--------|
| Mortality              | -0.349   | 0.246 | -1.417 | 0.156 | 0.706                               | 0.435  | 1.143  |
| Mechanical Ventilation | 0.988    | 0.332 | 2.979  | 0.003 | 2.687                               | 1.402  | 5.149  |
| Hospital LOS           | -3.715   | 1.495 | -2.485 | 0.013 | -0.218                              | -0.391 | -0.046 |
| ICU LOS                | -0.804   | 0.634 | -1.268 | 0.205 | -0.11                               | -0.28  | 0.06   |

**Supplemental Table 4: Characteristics of Early and Late NE Groups in Patients Receiving Quartile 2 of Fluids (0.815-2.334 mL/kg\*hr)**

|                                     | Late NE (N=347)               | Early NE (N=172) | Total (N=519)  | p value              |
|-------------------------------------|-------------------------------|------------------|----------------|----------------------|
| Age                                 | 65.9 (15.8)                   | 65.4 (14.3)      | 65.7 (15.3)    | 0.7051               |
| Ethnicity                           |                               |                  |                | 0.3552               |
|                                     | AMERICAN INDIAN/ALASKA NATIVE | 1.0 (0.3%)       | 1.0 (0.6%)     | 2.0 (0.4%)           |
|                                     | ASIAN                         | 11.0 (3.2%)      | 3.0 (1.7%)     | 14.0 (2.7%)          |
|                                     | BLACK/AFRICAN AMERICAN        | 33.0 (9.5%)      | 14.0 (8.1%)    | 47.0 (9.1%)          |
|                                     | HISPANIC/LATINO               | 9.0 (2.6%)       | 5.0 (2.9%)     | 14.0 (2.7%)          |
|                                     | OTHER                         | 11.0 (3.2%)      | 11.0 (6.4%)    | 22.0 (4.2%)          |
|                                     | UNABLE TO OBTAIN              | 4.0 (1.2%)       | 4.0 (2.3%)     | 8.0 (1.5%)           |
|                                     | UNKNOWN                       | 50.0 (14.4%)     | 16.0 (9.3%)    | 66.0 (12.7%)         |
|                                     | WHITE                         | 228.0 (65.7%)    | 118.0 (68.6%)  | 346.0 (66.7%)        |
| Male Gender                         | 210.0 (60.5%)                 | 95.0 (55.2%)     | 305.0 (58.8%)  | 0.2492               |
| OASIS Score                         | 40.2 (9.2)                    | 39.2 (8.5)       | 39.9 (9.0)     | 0.2121               |
| APSIii Score                        | 69.9 (25.5)                   | 64.9 (23.9)      | 68.2 (25.0)    | 0.0341               |
| SAPSIi Score                        | 47.6 (14.9)                   | 45.4 (14.4)      | 46.9 (14.8)    | 0.1091               |
| SOFA Score                          | 10.1 (3.7)                    | 9.9 (3.5)        | 10.1 (3.6)     | 0.5181               |
| AIDS                                | 5.0 (1.4%)                    | 1.0 (0.6%)       | 6.0 (1.2%)     | 0.3892               |
| CVD                                 | 52.0 (15.0%)                  | 11.0 (6.4%)      | 63.0 (12.1%)   | 0.0052               |
| COPD                                | 105.0 (30.3%)                 | 59.0 (34.3%)     | 164.0 (31.6%)  | 0.3512               |
| CHF                                 | 124.0 (35.7%)                 | 73.0 (42.4%)     | 197.0 (38.0%)  | 0.1382               |
| Dementia                            | 18.0 (5.2%)                   | 9.0 (5.2%)       | 27.0 (5.2%)    | 0.9832               |
| Diabetes with CC                    | 46.0 (13.3%)                  | 13.0 (7.6%)      | 59.0 (11.4%)   | 0.0542               |
| Diabetes without CC                 | 97.0 (28.0%)                  | 46.0 (26.7%)     | 143.0 (27.6%)  | 0.7722               |
| Malignant CA                        | 45.0 (13.0%)                  | 28.0 (16.3%)     | 73.0 (14.1%)   | 0.3072               |
| Metastatic Solid Tumor              | 17.0 (4.9%)                   | 5.0 (2.9%)       | 22.0 (4.2%)    | 0.2892               |
| Mild Liver Disease                  | 78.0 (22.5%)                  | 42.0 (24.4%)     | 120.0 (23.1%)  | 0.6222               |
| MI                                  | 75.0 (21.6%)                  | 36.0 (20.9%)     | 111.0 (21.4%)  | 0.8582               |
| Paraplegia                          | 13.0 (3.7%)                   | 2.0 (1.2%)       | 15.0 (2.9%)    | 0.0982               |
| Peptic Ulcer Disease                | 22.0 (6.3%)                   | 8.0 (4.7%)       | 30.0 (5.8%)    | 0.4382               |
| PVD                                 | 38.0 (11.0%)                  | 28.0 (16.3%)     | 66.0 (12.7%)   | 0.0862               |
| Renal Disease                       | 94.0 (27.1%)                  | 50.0 (29.1%)     | 144.0 (27.7%)  | 0.6352               |
| Rheumatic Disease                   | 16.0 (4.6%)                   | 5.0 (2.9%)       | 21.0 (4.0%)    | 0.3542               |
| Severe Liver Disease                | 44.0 (12.7%)                  | 24.0 (14.0%)     | 68.0 (13.1%)   | 0.6862               |
| Weight                              | 85.6 (25.2)                   | 87.9 (28.2)      | 86.4 (26.2)    | 0.3381               |
| Central Line                        | 259.0 (74.6%)                 | 95.0 (55.2%)     | 354.0 (68.2%)  | < 0.001 <sup>†</sup> |
| First Hospital Admission            | 256.0 (73.8%)                 | 117.0 (68.0%)    | 373.0 (71.9%)  | 0.1702               |
| First ICU Admission                 | 313.0 (90.2%)                 | 155.0 (90.1%)    | 468.0 (90.2%)  | 0.9752               |
| Hospital LOS                        | 15.9 (13.7)                   | 16.6 (20.0)      | 16.1 (16.0)    | 0.6511               |
| ICU LOS                             | 6.8 (6.9)                     | 5.1 (4.2)        | 6.3 (6.2)      | 0.0031               |
| Mortality                           | 94.0 (27.1%)                  | 33.0 (19.2%)     | 127.0 (24.5%)  | 0.0492               |
| Mechanically Ventilated Prior to NE | 212.0 (61.1%)                 | 90.0 (52.3%)     | 302.0 (58.2%)  | 0.0572               |
| Total Fluids                        | 1654.4 (876.0)                | 429.0 (305.1)    | 1248.3 (936.3) | < 0.001 <sup>†</sup> |
| Fluids per Kg per Hour              | 1.5 (0.5)                     | 1.6 (0.4)        | 1.5 (0.4)      | 0.2881               |
| Fluids per Kg                       | 19.7 (9.2)                    | 4.9 (2.9)        | 14.8 (10.4)    | < 0.001 <sup>†</sup> |
|                                     | Late NE (N=135)               | Early NE (N=82)  | Total (N=217)  | p value              |
| Mechanical Ventilation after NE     | 25.0 (18.5%)                  | 29.0 (35.4%)     | 54.0 (24.9%)   | 0.0052               |

**Supplemental Table 5: Outcomes in Early and Late NE Groups within Quartile 2**

| Predictor              | Estimate | SE    | Z      | p     | Odds Ratio or Standardized Estimate | Lower  | Upper  |
|------------------------|----------|-------|--------|-------|-------------------------------------|--------|--------|
| Mortality              | -0.293   | 0.26  | -1.127 | 0.26  | 0.746                               | 0.448  | 1.242  |
| Mechanical Ventilation | 1.048    | 0.359 | 2.923  | 0.003 | 2.852                               | 1.412  | 5.759  |
| Hospital LOS           | 1.342    | 1.551 | 0.865  | 0.387 | 0.039                               | -0.05  | 0.129  |
| ICU LOS                | -1.254   | 0.558 | -2.247 | 0.025 | -0.096                              | -0.179 | -0.012 |

**Supplemental Table 6: Characteristics of Early and Late NE Groups in Patients Receiving Quartile 3 of Fluids (2.334-5.075 mL/kg\*hr)**

|                                     | Late NE (N=290)               | Early NE (N=231) | Total (N=521)   | p value              |  |
|-------------------------------------|-------------------------------|------------------|-----------------|----------------------|--|
| Age                                 | 66.2 (15.3)                   | 65.6 (15.1)      | 66.0 (15.2)     | 0.6471               |  |
| Ethnicity                           |                               |                  |                 | 0.8072               |  |
|                                     | AMERICAN INDIAN/ALASKA NATIVE | 2.0 (0.7%)       | 0.0 (0.0%)      | 2.0 (0.4%)           |  |
|                                     | ASIAN                         | 7.0 (2.4%)       | 4.0 (1.7%)      | 11.0 (2.1%)          |  |
|                                     | BLACK/AFRICAN AMERICAN        | 30.0 (10.3%)     | 21.0 (9.1%)     | 51.0 (9.8%)          |  |
|                                     | HISPANIC/LATINO               | 10.0 (3.4%)      | 11.0 (4.8%)     | 21.0 (4.0%)          |  |
|                                     | OTHER                         | 13.0 (4.5%)      | 15.0 (6.5%)     | 28.0 (5.4%)          |  |
|                                     | UNABLE TO OBTAIN              | 5.0 (1.7%)       | 4.0 (1.7%)      | 9.0 (1.7%)           |  |
|                                     | UNKNOWN                       | 36.0 (12.4%)     | 31.0 (13.4%)    | 67.0 (12.9%)         |  |
|                                     | WHITE                         | 187.0 (64.5%)    | 145.0 (62.8%)   | 332.0 (63.7%)        |  |
| Male Gender                         | 166.0 (57.2%)                 | 139.0 (60.2%)    | 305.0 (58.5%)   | 0.5002               |  |
| OASIS Score                         | 40.2 (8.7)                    | 37.4 (8.8)       | 39.0 (8.9)      | < 0.001 <sup>1</sup> |  |
| APSIii Score                        | 66.7 (25.9)                   | 62.5 (24.9)      | 64.9 (25.5)     | 0.0591               |  |
| SAPSIi Score                        | 46.9 (14.7)                   | 44.3 (13.9)      | 45.7 (14.4)     | 0.0401               |  |
| SOFA Score                          | 9.7 (3.4)                     | 9.2 (3.2)        | 9.5 (3.3)       | 0.1151               |  |
| AIDS                                | 6.0 (2.1%)                    | 4.0 (1.7%)       | 10.0 (1.9%)     | 0.7802               |  |
| CVD                                 | 37.0 (12.8%)                  | 27.0 (11.7%)     | 64.0 (12.3%)    | 0.7122               |  |
| COPD                                | 88.0 (30.3%)                  | 65.0 (28.1%)     | 153.0 (29.4%)   | 0.5832               |  |
| CHF                                 | 70.0 (24.1%)                  | 67.0 (29.0%)     | 137.0 (26.3%)   | 0.2102               |  |
| Dementia                            | 15.0 (5.2%)                   | 15.0 (6.5%)      | 30.0 (5.8%)     | 0.5202               |  |
| Diabetes with CC                    | 24.0 (8.3%)                   | 29.0 (12.6%)     | 53.0 (10.2%)    | 0.1092               |  |
| Diabetes without CC                 | 59.0 (20.3%)                  | 47.0 (20.3%)     | 106.0 (20.3%)   | 1.0002               |  |
| Malignant Cancer                    | 61.0 (21.0%)                  | 31.0 (13.4%)     | 92.0 (17.7%)    | 0.0242               |  |
| Metastatic Solid Tumor              | 29.0 (10.0%)                  | 16.0 (6.9%)      | 45.0 (8.6%)     | 0.2152               |  |
| Mild Liver Disease                  | 55.0 (19.0%)                  | 29.0 (12.6%)     | 84.0 (16.1%)    | 0.0482               |  |
| MI                                  | 46.0 (15.9%)                  | 45.0 (19.5%)     | 91.0 (17.5%)    | 0.2802               |  |
| Paraplegia                          | 12.0 (4.1%)                   | 11.0 (4.8%)      | 23.0 (4.4%)     | 0.7312               |  |
| Peptic Ulcer Disease                | 16.0 (5.5%)                   | 11.0 (4.8%)      | 27.0 (5.2%)     | 0.6992               |  |
| PVD                                 | 33.0 (11.4%)                  | 38.0 (16.5%)     | 71.0 (13.6%)    | 0.0942               |  |
| Renal Disease                       | 61.0 (21.0%)                  | 61.0 (26.4%)     | 122.0 (23.4%)   | 0.1502               |  |
| Rheumatic Disease                   | 13.0 (4.5%)                   | 10.0 (4.3%)      | 23.0 (4.4%)     | 0.9322               |  |
| Severe Liver Disease                | 23.0 (7.9%)                   | 18.0 (7.8%)      | 41.0 (7.9%)     | 0.9532               |  |
| Weight                              | 79.1 (22.2)                   | 82.9 (21.8)      | 80.8 (22.1)     | 0.0491               |  |
| Central Line                        | 259.0 (74.6%)                 | 95.0 (55.2%)     | 354.0 (68.2%)   | < 0.001 <sup>2</sup> |  |
| First Hospital Admission            | 210.0 (72.4%)                 | 168.0 (72.7%)    | 378.0 (72.6%)   | 0.9372               |  |
| First ICU Admission                 | 271.0 (93.4%)                 | 212.0 (91.8%)    | 483.0 (92.7%)   | 0.4662               |  |
| Mechanically Ventilated prior to NE | 180.0 (62.1%)                 | 114.0 (49.4%)    | 294.0 (56.4%)   | 0.0042               |  |
| Hospital LOS                        | 15.2 (14.6)                   | 15.1 (15.8)      | 15.2 (15.1)     | 0.9131               |  |
| ICU LOS                             | 6.5 (6.4)                     | 5.1 (5.6)        | 5.9 (6.1)       | 0.0101               |  |
| Mortality                           | 59.0 (20.3%)                  | 34.0 (14.7%)     | 93.0 (17.9%)    | 0.0962               |  |
| Total Fluids                        | 3337.9 (1569.1)               | 958.6 (551.3)    | 2283.0 (1703.7) | < 0.001 <sup>1</sup> |  |
| Fluids per Kg per Hour              | 3.5 (0.8)                     | 3.6 (0.8)        | 3.5 (0.8)       | 0.1301               |  |
| Fluids per Kg                       | 42.9 (18.3)                   | 11.9 (6.4)       | 29.2 (21.0)     | < 0.001 <sup>1</sup> |  |
|                                     | Late NE (N=110)               | Early NE (N=117) | Total (N=227)   | p value              |  |
| Mechanical Ventilation after NE     | 23.0 (20.9%)                  | 24.0 (20.5%)     | 47.0 (20.7%)    | 0.9412               |  |

**Supplemental Table 7: Outcomes in Early and Late NE Groups within Quartile 3**

| Predictor              | Estimate | SE    | Z      | p     | Odds Ratio of Standardized Estimate | Lower  | Upper |
|------------------------|----------|-------|--------|-------|-------------------------------------|--------|-------|
| Mortality              | 0.014    | 0.291 | 0.047  | 0.962 | 1.014                               | 0.573  | 1.794 |
| Mechanical Ventilation | 0.291    | 0.458 | 0.634  | 0.526 | 1.337                               | 0.545  | 3.282 |
| Hospital LOS           | -0.238   | 1.266 | -0.188 | 0.851 | -0.008                              | -0.09  | 0.074 |
| ICU LOS                | -0.94    | 0.511 | -1.841 | 0.066 | -0.076                              | -0.158 | 0.005 |

**Supplemental Table 8: Baseline Characteristics of Early and Late NE Groups in Patients Receiving Quartile 4 of Fluids (>5.075 mL/kg\*hr)**

|                                     | Late NE (N=134)        | Early NE (N=383) | Total (N=517)   | p value              |
|-------------------------------------|------------------------|------------------|-----------------|----------------------|
| Age                                 | 66.6 (16.3)            | 65.5 (16.0)      | 65.8 (16.1)     | 0.4631               |
| Ethnicity                           |                        |                  |                 | 0.1892               |
|                                     | ASIAN                  | 14.0 (3.7%)      | 23.0 (4.4%)     |                      |
|                                     | BLACK/AFRICAN AMERICAN | 34.0 (8.9%)      | 45.0 (8.7%)     |                      |
|                                     | HISPANIC/LATINO        | 10.0 (2.6%)      | 17.0 (3.3%)     |                      |
|                                     | OTHER                  | 22.0 (5.7%)      | 27.0 (5.2%)     |                      |
|                                     | UNABLE TO OBTAIN       | 6.0 (1.6%)       | 9.0 (1.7%)      |                      |
|                                     | UNKNOWN                | 38.0 (9.9%)      | 44.0 (8.5%)     |                      |
|                                     | WHITE                  | 259.0 (67.6%)    | 352.0 (68.1%)   |                      |
| Male Gender                         | 69.0 (51.5%)           | 225.0 (58.7%)    | 294.0 (56.9%)   | 0.1442               |
| OASIS Score                         | 39.0 (9.4)             | 38.1 (9.9)       | 38.3 (9.8)      | 0.3271               |
| APSi Score                          | 69.0 (29.8)            | 62.4 (24.3)      | 64.1 (26.0)     | 0.0121               |
| SAPSi Score                         | 46.9 (15.5)            | 44.0 (14.9)      | 44.8 (15.1)     | 0.0551               |
| SOFA Score                          | 9.1 (3.3)              | 9.1 (3.2)        | 9.1 (3.2)       | 0.9291               |
| AIDS                                | 3.0 (2.2%)             | 4.0 (1.0%)       | 7.0 (1.4%)      | 0.3032               |
| CVD                                 | 9.0 (6.7%)             | 38.0 (9.9%)      | 47.0 (9.1%)     | 0.2672               |
| COPD                                | 35.0 (26.1%)           | 104.0 (27.2%)    | 139.0 (26.9%)   | 0.8162               |
| CHF                                 | 27.0 (20.1%)           | 105.0 (27.4%)    | 132.0 (25.5%)   | 0.0972               |
| Dementia                            | 5.0 (3.7%)             | 18.0 (4.7%)      | 23.0 (4.4%)     | 0.6402               |
| Diabetes with CC                    | 9.0 (6.7%)             | 37.0 (9.7%)      | 46.0 (8.9%)     | 0.3032               |
| Diabetes without CC                 | 23.0 (17.2%)           | 96.0 (25.1%)     | 119.0 (23.0%)   | 0.0612               |
| Malignant Cancer                    | 23.0 (17.2%)           | 71.0 (18.5%)     | 94.0 (18.2%)    | 0.7232               |
| Metastatic Solid Tumor              | 10.0 (7.5%)            | 30.0 (7.8%)      | 40.0 (7.7%)     | 0.8902               |
| Mild Liver Disease                  | 14.0 (10.4%)           | 58.0 (15.1%)     | 72.0 (13.9%)    | 0.1772               |
| MI                                  | 17.0 (12.7%)           | 67.0 (17.5%)     | 84.0 (16.2%)    | 0.1942               |
| Paraplegia                          | 12.0 (9.0%)            | 18.0 (4.7%)      | 30.0 (5.8%)     | 0.0702               |
| Peptic Ulcer Disease                | 7.0 (5.2%)             | 24.0 (6.3%)      | 31.0 (6.0%)     | 0.6622               |
| PVD                                 | 14.0 (10.4%)           | 45.0 (11.7%)     | 59.0 (11.4%)    | 0.6832               |
| Renal Disease                       | 23.0 (17.2%)           | 89.0 (23.2%)     | 112.0 (21.7%)   | 0.1422               |
| Rheumatic Disease                   | 7.0 (5.2%)             | 10.0 (2.6%)      | 17.0 (3.3%)     | 0.1442               |
| Severe Liver Disease                | 3.0 (2.2%)             | 32.0 (8.4%)      | 35.0 (6.8%)     | 0.0152               |
| Weight                              | 68.2 (15.5)            | 76.8 (21.7)      | 74.6 (20.6)     | < 0.001 <sup>1</sup> |
| Central Line                        | 110.0 (82.1%)          | 191.0 (49.9%)    | 301.0 (58.2%)   | < 0.001 <sup>2</sup> |
| First Hospital Admission            | 94.0 (70.1%)           | 273.0 (71.3%)    | 367.0 (71.0%)   | 0.8042               |
| First ICU Admission                 | 128.0 (95.5%)          | 344.0 (89.8%)    | 472.0 (91.3%)   | 0.0442               |
| Mechanically Ventilated prior to NE | 74.0 (55.2%)           | 171.0 (44.6%)    | 245.0 (47.4%)   | 0.0352               |
| Hospital LOS                        | 14.5 (13.7)            | 20.1 (63.1)      | 18.7 (54.8)     | 0.3041               |
| ICU LOS                             | 6.4 (6.7)              | 6.5 (19.8)       | 6.5 (17.3)      | 0.9251               |
| Mortality                           | 27.0 (20.1%)           | 59.0 (15.4%)     | 86.0 (16.6%)    | 0.2042               |
| Total Fluids                        | 4756.6 (1908.1)        | 1742.9 (1377.5)  | 2524.0 (2022.5) | < 0.001 <sup>1</sup> |
| Fluids per Kg per Hour              | 7.4 (2.6)              | 19.5 (44.1)      | 16.4 (38.3)     | 0.0011               |
| Fluids per Kg                       | 71.5 (29.8)            | 23.9 (19.6)      | 36.2 (30.8)     | < 0.001 <sup>1</sup> |
|                                     | Late NE (N=60)         | Early NE (N=212) | Total (N=272)   | p value              |
| Mechanical Ventilation after NE     | 11.0 (18.3%)           | 48.0 (22.6%)     | 59.0 (21.7%)    | 0.4752               |

**Supplemental Table 9: Outcomes in Early and Late NE Groups within Quartile 4**

| Predictor              | Estimate | SE    | Z      | p     | Odds ratio | Lower  | Upper |
|------------------------|----------|-------|--------|-------|------------|--------|-------|
| Mortality              | -0.197   | 0.328 | -0.599 | 0.549 | 0.821      | 0.432  | 1.564 |
| Mechanical Ventilation | 0.369    | 0.451 | 0.819  | 0.413 | 1.447      | 0.598  | 3.5   |
| Hospital LOS           | 2.566    | 5.743 | 0.447  | 0.655 | 0.021      | -0.07  | 0.111 |
| ICU LOS                | -0.072   | 1.832 | -0.039 | 0.969 | -0.002     | -0.093 | 0.089 |
